# Supplementary material for: Facile fabrication and low-temperature bonding of Cu@Sn–Bi core–shell particles for conductive pastes
Source: Royal Society of Chemistry journal article supplement (doi:10.1039/d1ra02514g), 2021-01-01
Supplement: d1ra02514g1.pdf [file d1ra02514g1.pdf]

## Electronic Supplementary Information

### **Facile fabrication and low temperature bonding of Cu@Sn-Bi core-shell particles for conductive paste**

Zhehan Yang, Yi Pan, Hengyu Zhao, Xiangmin Yang, Ying Liang, Zhen Zhang\* and Bin Fang\*

Institute of Nuclear Technology and Application, School of Science, East China University of Science and Technology, Shanghai 200237, P. R. China.

E-mail: zhangzhen@ecust.edu.cn; binfang@ecust.edu.cn

**Table S1** The experimental conditions of Cu@Sn-Bi particles

| Sample | The mass ratio of Sn to Bi              | The mass ratio of Cu to Sn-Bi | Stirring speed |
|--------|-----------------------------------------|-------------------------------|----------------|
| 1      | 48:52 (Self-made, 3-10 nm)              | 1:5                           | 300 rpm        |
| 2      | 48:52 (Self-made, 3-10 nm)              | 2:5                           | 300 rpm        |
| 3      | 48:52 (Self-made, 3-10 nm)              | 4:5                           | 90 rpm         |
| 4      | 48:52 (Self-made, 3-10 nm)              | 4:5                           | 180 rpm        |
| 5      | 48:52 (Self-made, 3-10 nm)              | 4:5                           | 240 rpm        |
| 6      | 48:52 (Self-made, 3-10 nm)              | 4:5                           | 300 rpm        |
| 7      | 42:58 (purchased, 10-25 $\mu\text{m}$ ) | 4:5                           | 300 rpm        |
| 8      | 48:52 (Self-made, 3-10 nm)              | 6:5                           | 300 rpm        |

Ripening condition: 160 °C, 30 min and 180 °C, 10 min.

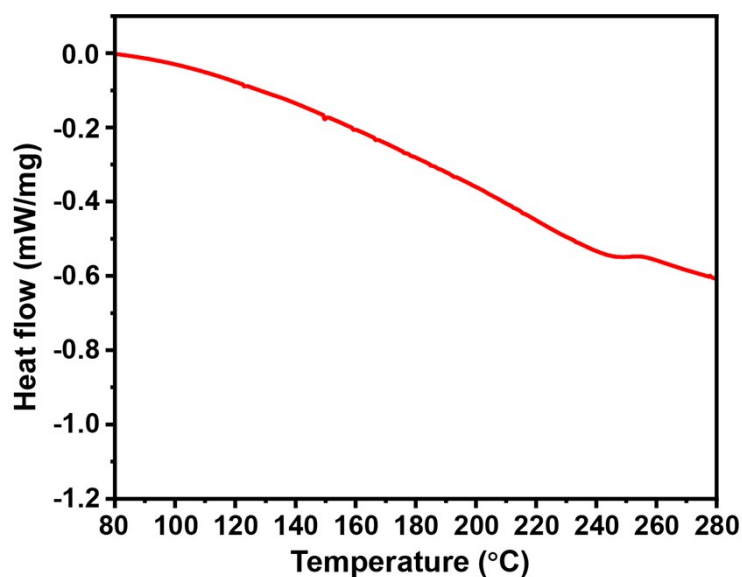

**Fig. S1** DSC result of Sn and Bi NPs mixtures.

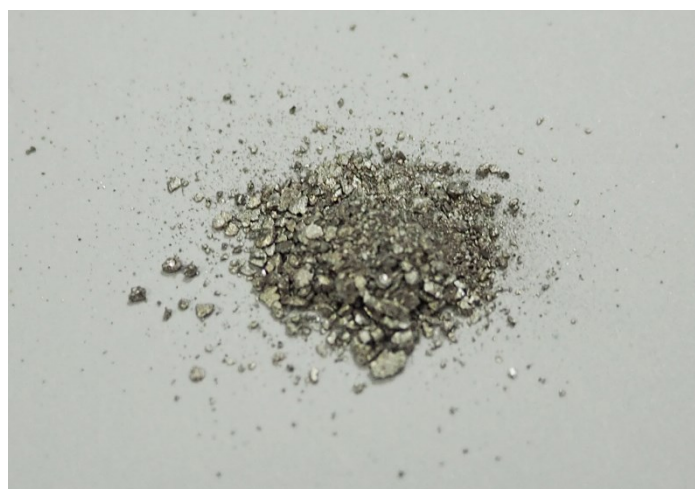

**Fig. S2** Digital photograph of as-synthesized Cu@Sn-Bi at the stirring speed of 90 rpm (Sample 3).

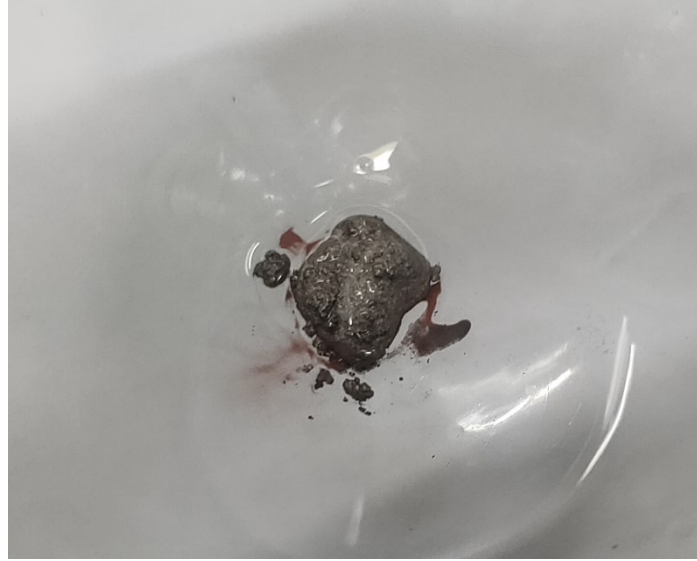

**Fig. S3** Digital photograph of as-synthesized Cu@Sn-Bi using the purchased Sn-Bi alloy particles ( $10 \leq d \leq 25 \mu\text{m}$ ) as the precursor (Sample 7).

**Table S2** The volume resistivity of printed circuits using different Cu@Sn-Bi paste solidified at different temperature

| Fillers      | Volume resistivity ( $\mu\Omega \cdot \text{cm}$ ) |                        | Solidifying temperature ( $^{\circ}\text{C}$ ) |                        |                        |  |  |
|--------------|----------------------------------------------------|------------------------|------------------------------------------------|------------------------|------------------------|--|--|
|              | 160 $^{\circ}\text{C}$                             | 180 $^{\circ}\text{C}$ | 200 $^{\circ}\text{C}$                         | 220 $^{\circ}\text{C}$ | 240 $^{\circ}\text{C}$ |  |  |
| Cu@Sn-Bi-0.2 | over testing range                                 | $1.03 \times 10^7$     | $6.52 \times 10^6$                             | $8.76 \times 10^6$     | over testing range     |  |  |
| Cu@Sn-Bi-0.4 | $2.98 \times 10^7$                                 | 76300                  | 73400                                          | 85600                  | $6.46 \times 10^6$     |  |  |
| Cu@Sn-Bi-0.8 | $2.34 \times 10^8$                                 | 550                    | 481                                            | 556                    | $1.80 \times 10^7$     |  |  |
| Cu@Sn-Bi-1.2 | over testing range                                 |                        |                                                |                        |                        |  |  |

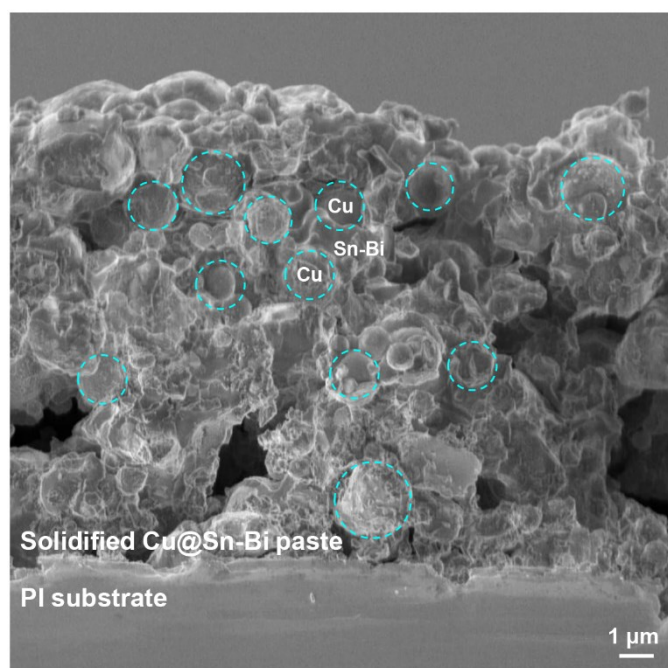

**Fig. S4** The cross section SEM image of printed circuit (Cu@Sn-Bi-0.8) solidified at 180°C. The SEM image taken with 3.0 kV accelerating voltage.

**Table S3** The volume resistivity of Cu based conductive inks

| Ref       | Filler                       | Size               | Content (%) | Curing temperature (°C) | Volume resistivity ( $\mu\Omega\cdot\text{cm}$ ) |
|-----------|------------------------------|--------------------|-------------|-------------------------|--------------------------------------------------|
| 1         | Cu                           | $45 \pm 5$ nm      | 100         | 400                     | $3.32 \times 10^{10}$                            |
| 2         | Cu and $\text{Cu}_2\text{O}$ | < 10 nm            | 67          | 300                     | 480                                              |
| 3         | Cu@Ag                        | 11.7 nm            | 70          | chemical sintering      | 300                                              |
| 4         | Cu                           | 20-110 nm          | 100         | 200                     | 1100                                             |
|           |                              |                    |             | 300                     | 86                                               |
| 5         | Cu                           | 10-20 nm           | 100         | 200                     | 730                                              |
| 6         | Cu                           | 37 nm              | 100         | 200                     | 62                                               |
| This work | Cu@Sn-Bi                     | 1.82 $\mu\text{m}$ | 59          | 200                     | 481                                              |

[1] J. Kwon, H. Cho, H. Eom, H. Lee, Y. D. Suh, H. Moon, J. Shin, S. Hong and S. H. Ko, ACS Appl. Mater. Interfaces, 2016, 8, 11575-11582.

[2] T. Y. Dong, H. H. Wu, C. Huang, J. M. Song, I. G. Chen and T. H. Kao, Appl. Surf. Sci., 2009, 255, 3891-3896.

- [3] X. F. Dai, W. Xu, T. Zhang, H. B. Shi and T. Wang, Chem. Eng. J., 2019, 364, 310-319.
- [4] J. F. Yan, G. S. Zou, A. M. Hu and Y. N. Zhou, J. Mater. Chem., 2011, 21, 15981-15986.
- [5] P. Pulkkinen, J. Shan, K. Leppanen, A. Kansakoski, A. Laiho, M. Jarn and H. Tenhu, ACS Appl. Mater. Interfaces, 2009, 1, 519-525.
- [6] Y. S. Goo, Y. I. Lee, N. Kim, K. J. Lee, B. Y. Yoo, S. J. Hong, J. D. Kim, Y. H. Choa, Surf. Coat. Tech., 2010, 205, S369-S372.

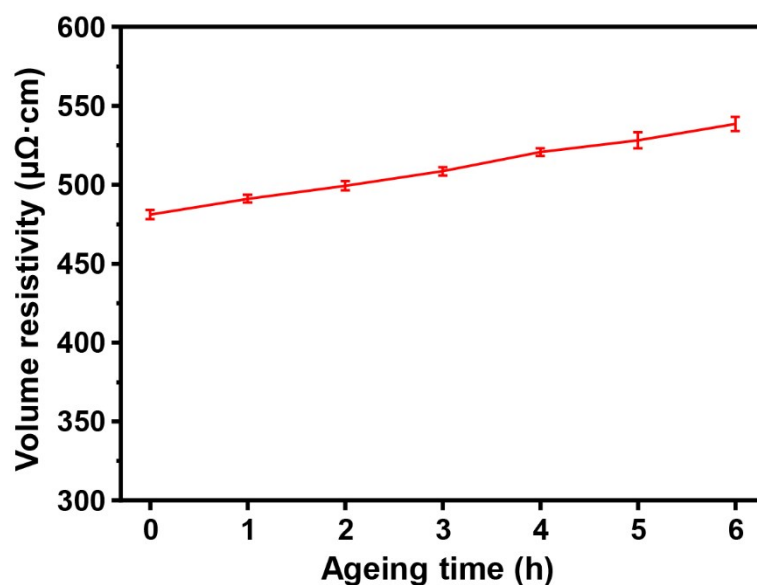

**Fig. S5** The variation of volume resistivity after ageing for 6 h at 190°C.  
(Cu@Sn-Bi-0.8 paste sintered at 200 °C)

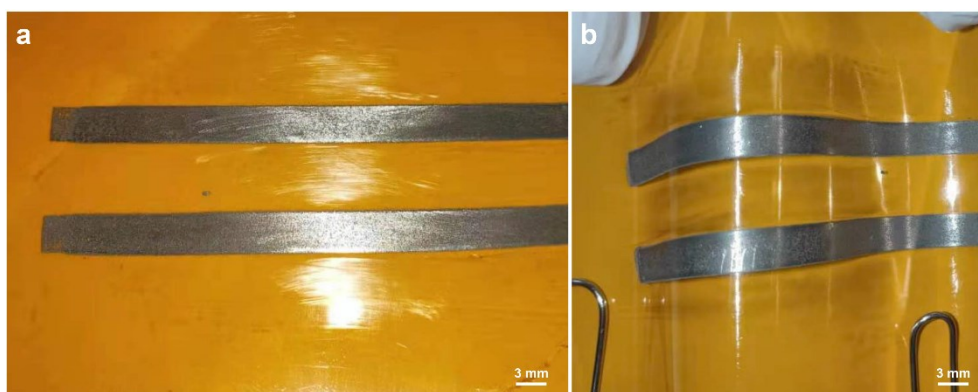

**Fig. S6** (a) The digital photograph of circuits on the PI film using Cu@Sn-Bi-0.8 paste solidified at 200°C; (b) the corresponding circuits after 100 cycles of repetitive strain around the cylinder.
